# Supplementary material
Source: Springer Nature journal article supplement (https://www.springermedizin.de/resource/supplementary/12875_2005_139_MOESM6_ESM.pdf/9436514)

## Interest in network activities of all survey respondents (moderate + high interest)

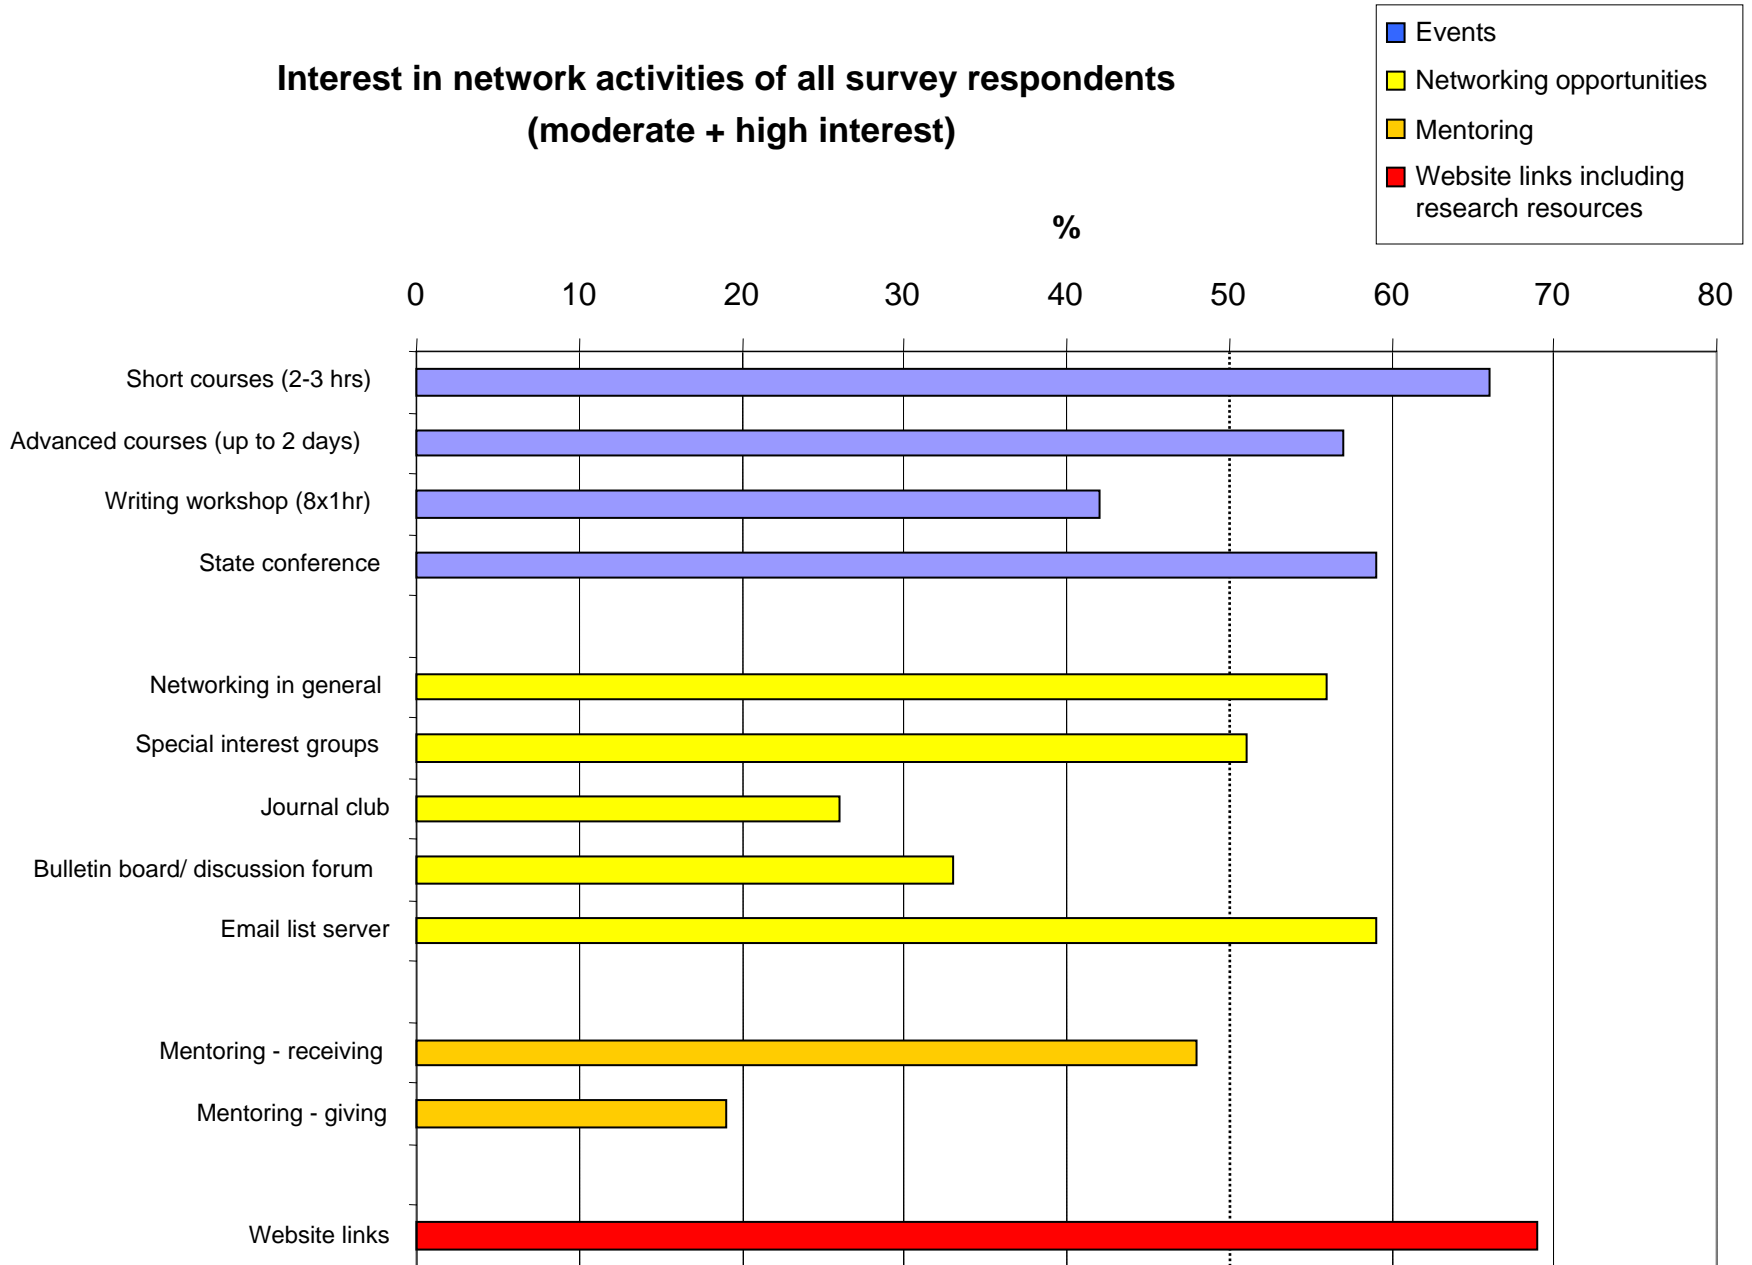

Supplement: MOESM6 [file 9436514]
